# Supplementary material for: Not Only a Weed Plant—Biological Activities of Essential Oil and Hydrosol of Dittrichia viscosa (L.) Greuter
Source: MDPI journal article supplement (doi:10.3390/plants10091837), 2021-09-04
Supplement: s1 [file s1]

Table S1. Mass concentration range of the standards, the corresponding correlation coefficients ( $r^2$ ) and the retention time

| Phenolic compound                      | Working range ( $\mu\text{g mL}^{-1}$ ) | $r^2$  | Retention time (min) |
|----------------------------------------|-----------------------------------------|--------|----------------------|
| 3,4-dihydroxybenzoic acid              | 0.46-268.80                             | 0.9999 | 20.76                |
| caffeic acid                           | 0.20-124.60                             | 0.9999 | 28.04                |
| <i>trans</i> - <i>o</i> -coumaric acid | 0.13-80.20                              | 0.9999 | 37.94                |
| cinnamic acid                          | 0.13-81.80                              | 0.9996 | 46.00                |
| luteolin                               | 5.12-200.00                             | 0.9997 | 49.09                |
